# Supplementary material
Source: PubMed Central journal article supplement (PMC5604311)
Supplement: NIHMS903855-supplement-supplement_1.pdf [file NIHMS903855-supplement-supplement_1.pdf]

**Supplementary Table S1: Odds Ratios of Neuropathology Outcomes for Predicted HDL and Non-HDL Levels 10 Years Prior to Death**

| Outcome                                | Freq (N)  | Odds Ratio (95% CI) for a 1 SD Difference |                   |
|----------------------------------------|-----------|-------------------------------------------|-------------------|
|                                        |           | HDL                                       | Non-HDL           |
| <b>Braak Stage 5 or 6</b>              | 110 (392) | 1.21 (0.95, 1.55)                         | 0.83 (0.65, 1.07) |
| <b>CERAD Intermediate or Frequent</b>  | 187 (392) | 0.95 (0.76, 1.18)                         | 0.86 (0.70, 1.07) |
| <b>Any Cerebral Amyloid Angiopathy</b> | 112 (388) | 1.20 (0.95, 1.51)                         | 0.95 (0.75, 1.20) |
| <b>Presence of Cystic Infarcts</b>     | 119 (386) | 0.92 (0.73, 1.17)                         | 1.07 (0.86, 1.33) |
| <b>Presence of Microinfarcts</b>       |           |                                           |                   |
| Any                                    | 132 (390) | 0.92 (0.73, 1.16)                         | 0.91 (0.72, 1.14) |
| Any cerebral                           | 43 (390)  | 1.02 (0.81, 1.28)                         | 0.93 (0.74, 1.16) |
| Any deep                               | 119 (388) | 0.90 (0.71, 1.14)                         | 0.96 (0.77, 1.21) |
| <b>Lewy Bodies</b>                     |           |                                           |                   |
| Any                                    | 73 (391)  | 1.04 (0.79, 1.37)                         | 1.12 (0.87, 1.44) |
| SN or LC                               | 58 (391)  | 0.90 (0.58, 1.11)                         | 1.24 (0.95, 1.63) |
| Amygdala                               | 57 (370)  | 1.19 (0.89, 1.61)                         | 1.08 (0.82, 1.43) |
| Frontal or temporal cortex             | 24 (390)  | 1.15 (0.74, 1.79)                         | 1.04 (0.68, 1.57) |

SN= substantia nigra; LC=locus ceruleus

## Supplementary Table S2: Sensitivity Analysis

Key: YTD=years to death; LB= Lewy bodies; SN= substantia nigra; LC= locus ceruleus; \* indicates

|                      | <b>Primary Analysis 1:<br/>Age 70</b> | <b>Primary Analysis 2:<br/>10 YTD</b> | <b>Sensitivity Analysis:<br/>20 YTD</b> |
|----------------------|---------------------------------------|---------------------------------------|-----------------------------------------|
| Any LB               | 1.35 (1.02, 1.79)*                    | 1.12 (0.87, 1.44)                     | 1.33 (0.97, 1.81)                       |
| LB in SN/LC          | 1.45 (1.07, 1.96)*                    | 1.24 (0.95, 1.63)                     | 1.42 (1.01, 1.98)*                      |
| LB in Amygdala       | 1.29 (0.95, 1.74)                     | 1.08 (0.82, 1.43)                     | 1.39 (0.98, 1.98)                       |
| LB in Frontal Cortex | 1.45 (0.99, 2.13)                     | 1.04 (0.68, 1.57)                     | 1.49 (0.94, 2.37)                       |

$p < 0.05$ ; values shown are estimated odds ratio associated with a 1 standard deviation (SD) difference in estimated non-HDL cholesterol. 95% confidence intervals are given in parentheses.
